# Supplementary material for: Quantitative analysis of the TNF-α-induced phosphoproteome reveals AEG-1/MTDH/LYRIC as an IKKβ substrate
Source: PubMed Central journal article supplement (PMC4396366; doi:10.1038/ncomms7658), 2015-04-07
Supplement: ncomms7658-s1.pdf [file ncomms7658-s1.pdf]

## Supplementary Figure 1

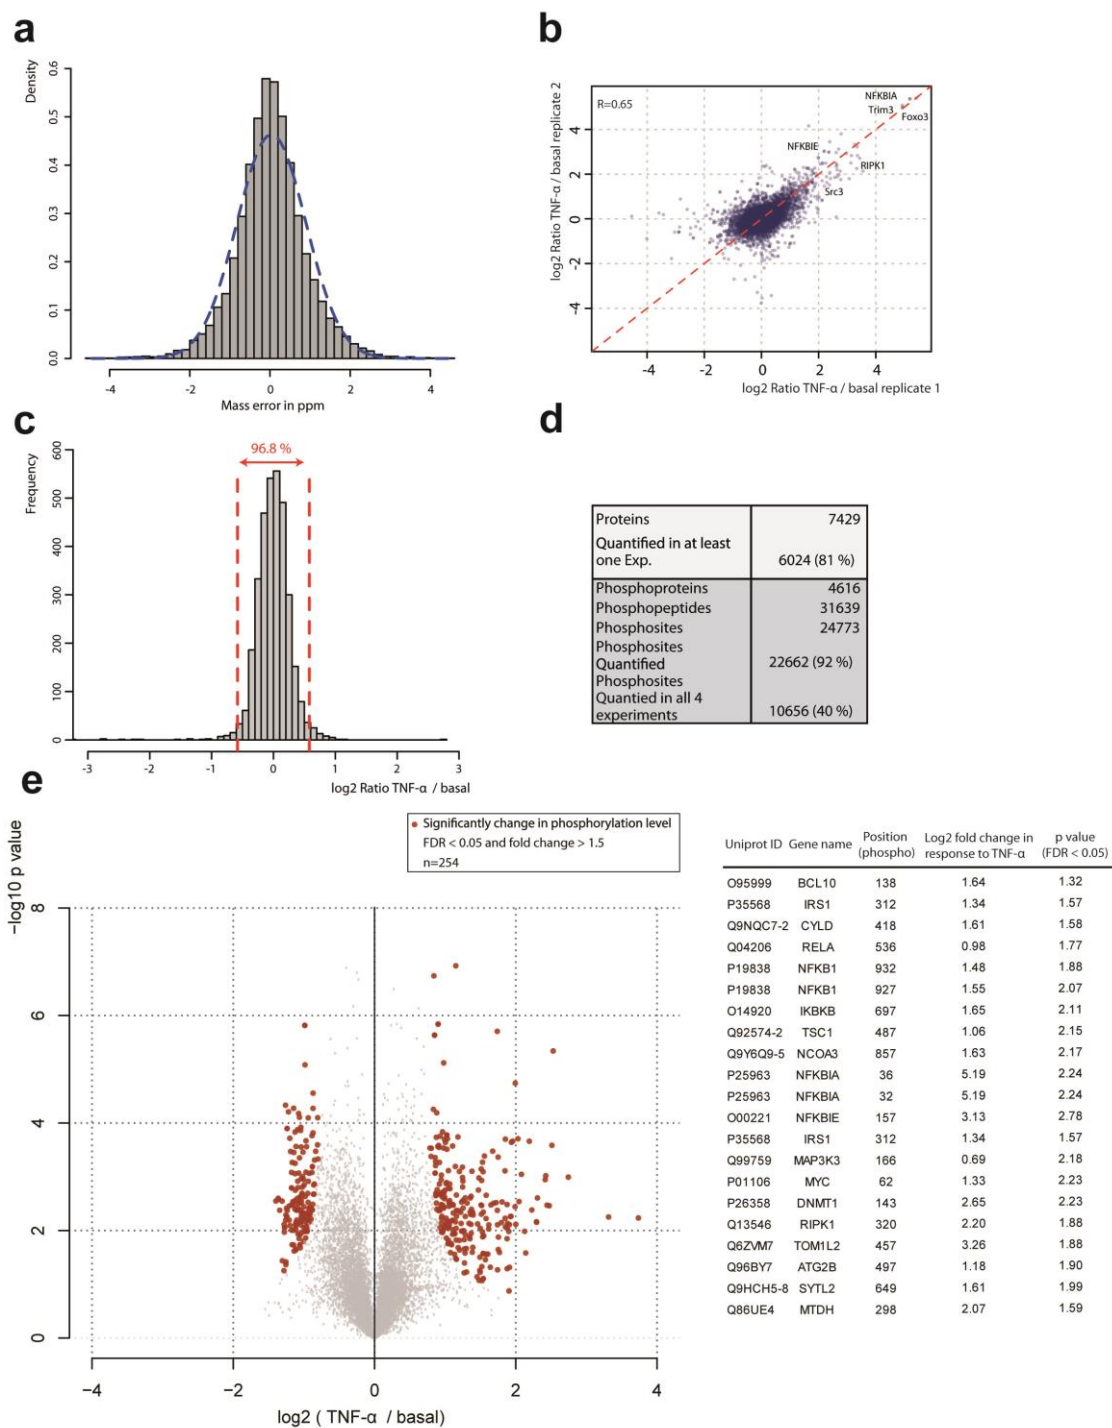

**Supplementary Figure 1: Statistical analysis of the phosphoproteome and proteome dataset.** (a) Histogram indicating the mass errors of detected phosphorylation sites and 95 % of all detected phosphopeptides fit less than 2 ppm. Blue broken-line shows Gaussian distribution. (b) Correlation between the biological replicates was determined by Pearson

correlation coefficient. Known phosphoproteins involved in the TNF- $\alpha$ -mediated signalling pathway are indicated. (c) Expression changes were analysed from the identified proteins and 96.8 % of detected proteins did not show changes in protein expression levels upon TNF- $\alpha$  stimulation. (d) Number of identified and quantified proteins and phosphopeptides from the global phosphoproteomics screen are represented in the table. (e) Volcano plot showing the fold change in response to TNF- $\alpha$  stimulation compared to p- values from a two-sided t-test. Red dots represent significant changes at a FDR cut off of 0.05 (parameters:  $s_0=0.6$ , permutations: 500). The table depicts selected candidates for up-regulated phosphorylation sites in response to TNF- $\alpha$  stimulation.



### Supplementary Figure 3

**a**

Computational prediction for TNF- $\alpha$  mediated IKK $\beta$  substrates

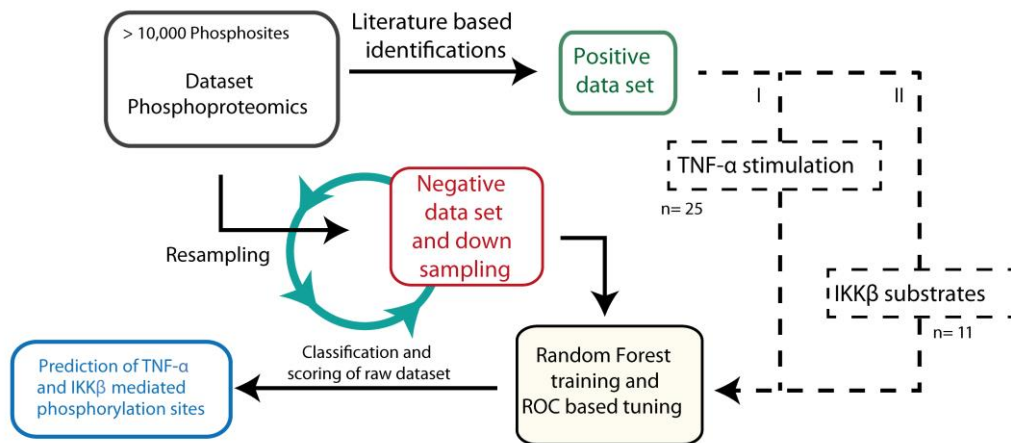

**b**

| Fold change implication                            | Relative inhibition  | Sequence Scoring                            |
|----------------------------------------------------|----------------------|---------------------------------------------|
| ○ Fold change after TNF- $\alpha$ stimulation      | ○ IKK $\beta$ (K44M) | ○ Position scoring matrix (sequence window) |
| ○ Fold change in IKK $\beta$ (K44M) overexpression | ○ SC-514             |                                             |
| ○ Fold change in IKK $\beta$ overexpression        |                      |                                             |

**Supplementary Figure 3: Schematic overview of computational workflow.** (a) Random forest approach with down sampling was used for the prediction of IKK $\beta$  substrates and TNF- $\alpha$  mediated phosphorylation sites. Positive phosphorylation sites were identified by literature search that were utilized to train the classifiers. Resampling of the remaining dataset was practiced to create a negative data set. Both classifiers were then utilized to predict the substrates of IKK $\beta$  and TNF- $\alpha$  dependent phosphorylation sites. (b) Table representing features of each phosphorylation site used. Sequence scoring matrix was applied for the assessment of amino acid based identification of the IKK $\beta$  substrates.

## Supplementary Figure 4

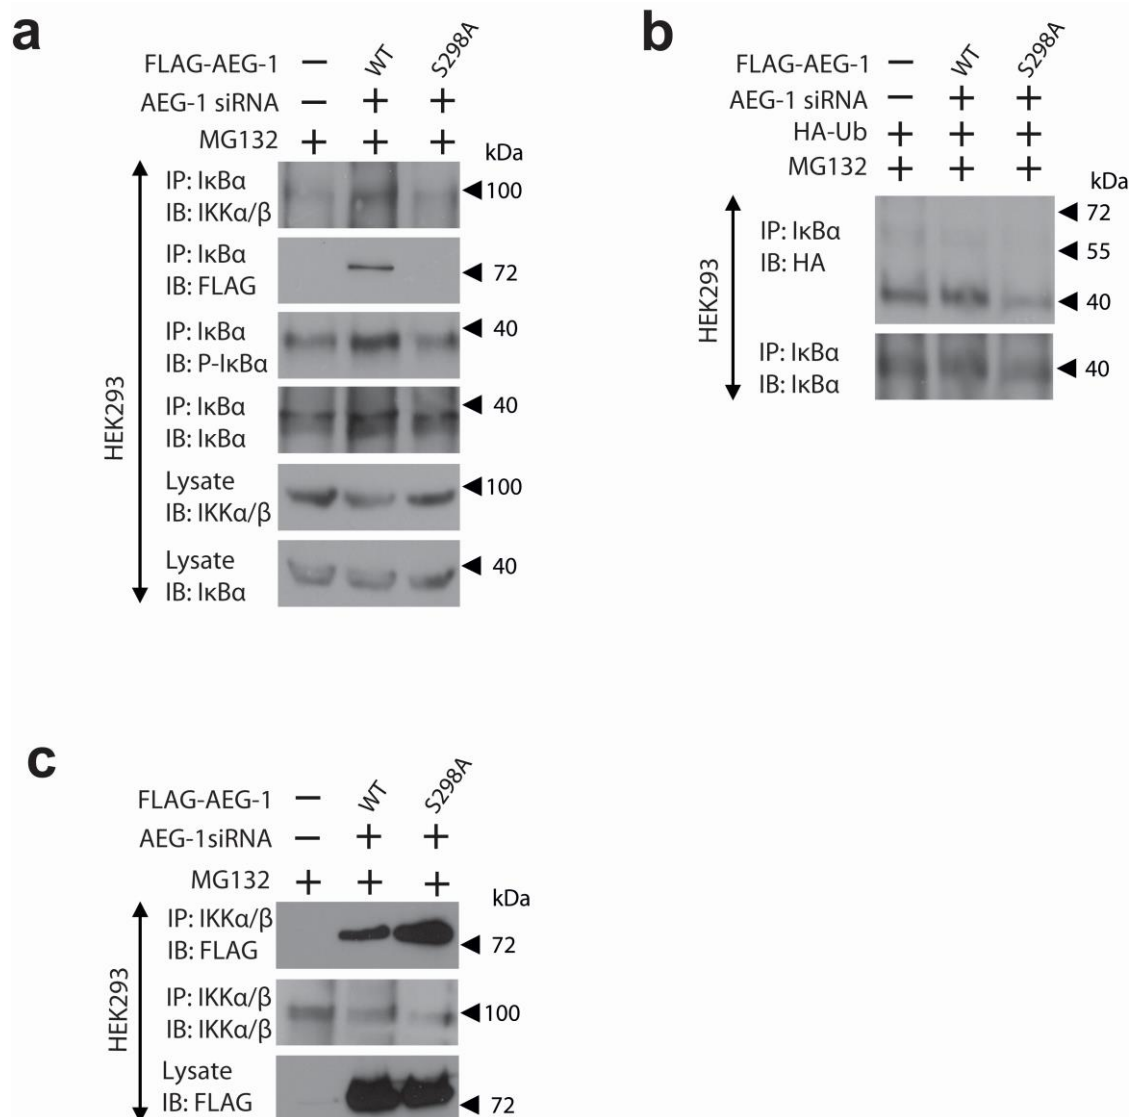

**Supplementary Figure 4: Phosphorylation of AEG-1 serine 298 is required for IKKβ-mediated IκBα phosphorylation, ubiquitination and degradation.** (a) HEK293 cells were transfected with control or AEG-1 siRNA. After 24 hours, the cells were transfected with either vector or FLAG-tagged wild-type (WT) or S298A mutant of AEG-1. 48 hours later, cells were treated with MG132 (20μM) for 2 hours and lysed. IκBα was immunoprecipitated from cell lysates. The precipitates were immunoblotted using respective antibodies (b) HEK293 cells were transfected as in (a) in combination with HA-tagged ubiquitin. IκBα was immunoprecipitated as described above. The precipitates were immunoblotted using anti-HA antibody. (c) HEK293 cells were treated as above. Protein complex from the precipitates were immunoblotted using anti-FLAG and anti IKKα/β antibodies.

## Supplementary Figure 5

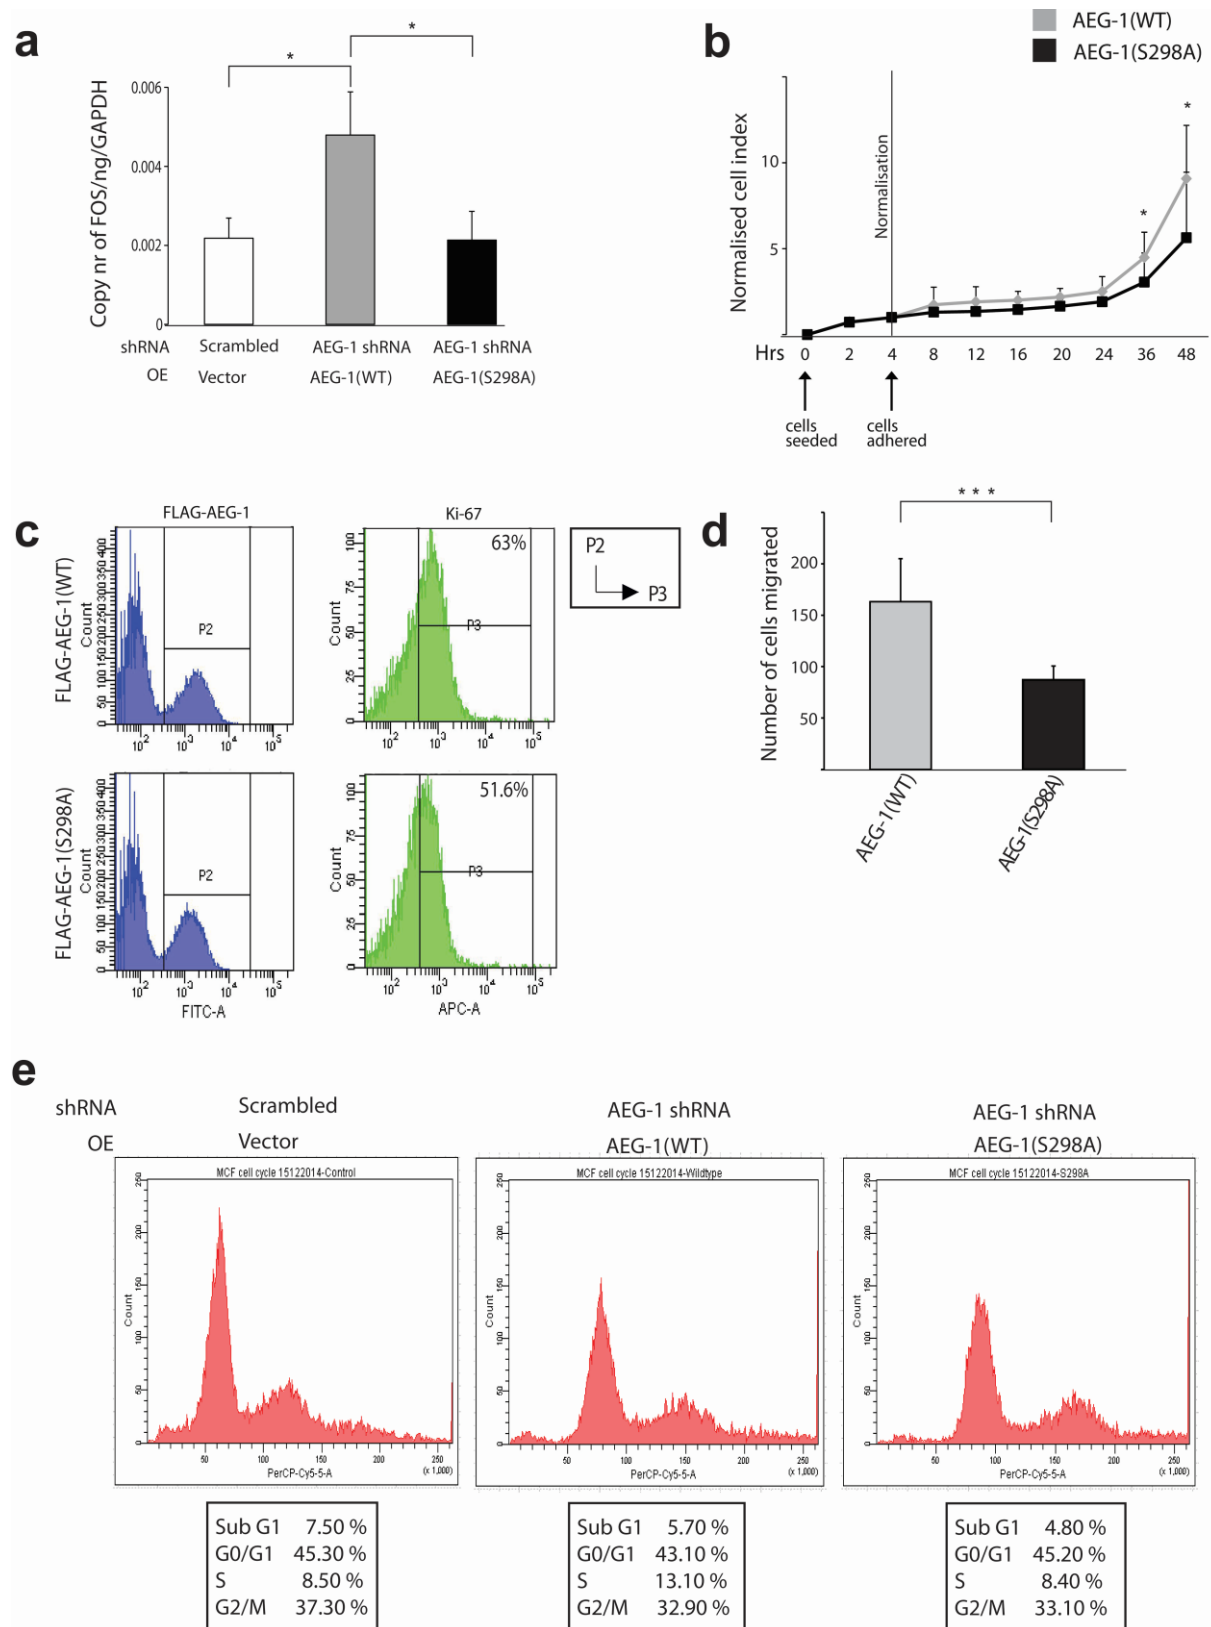

**Supplementary Figure 5: Role of serine 298 in NF- $\kappa$ B-mediated gene expression, cell proliferation and migration.** (a) RNA from stable 4T1 cells was isolated and expression of NF- $\kappa$ B-regulated Fos gene was determined (b) MCF-7 cells transfected with wild-type (WT)

or mutant (S298A) AEG-1 were seeded onto the E-Plate. Real-time, label-free impedance measurement was carried out for 48 hours. (c) Wild-type or S298A AEG-1 was overexpressed in HEK293 cells. After starvation and stimulation with TNF- $\alpha$  for 12 hours, cell pellets were collected, fixed with 4% PFA and immunostained using anti-FLAG-FITC and anti-Ki-67. The percentage of Ki-67-positive cells in the FLAG-positive group was quantified. (d) MCF-7 cells transfected with wild-type or S298A AEG-1 were trypsinized and counted.  $3 \times 10^5$  cells in RPMI containing 0.5% FBS were seeded into the upper chamber of a transwell plate. Cells were allowed to migrate for 24 hours. Migrated cells were then fixed, stained and counted as described in Methods. (e) Cell cycle distributions of 7-AAD stained stable MCF-7 cells. All plots represent mean values  $\pm$  SD from triplicates. \*,  $P < 0.05$ .

## Supplementary Figure 6

Original immunoblot data for Fig. 1c

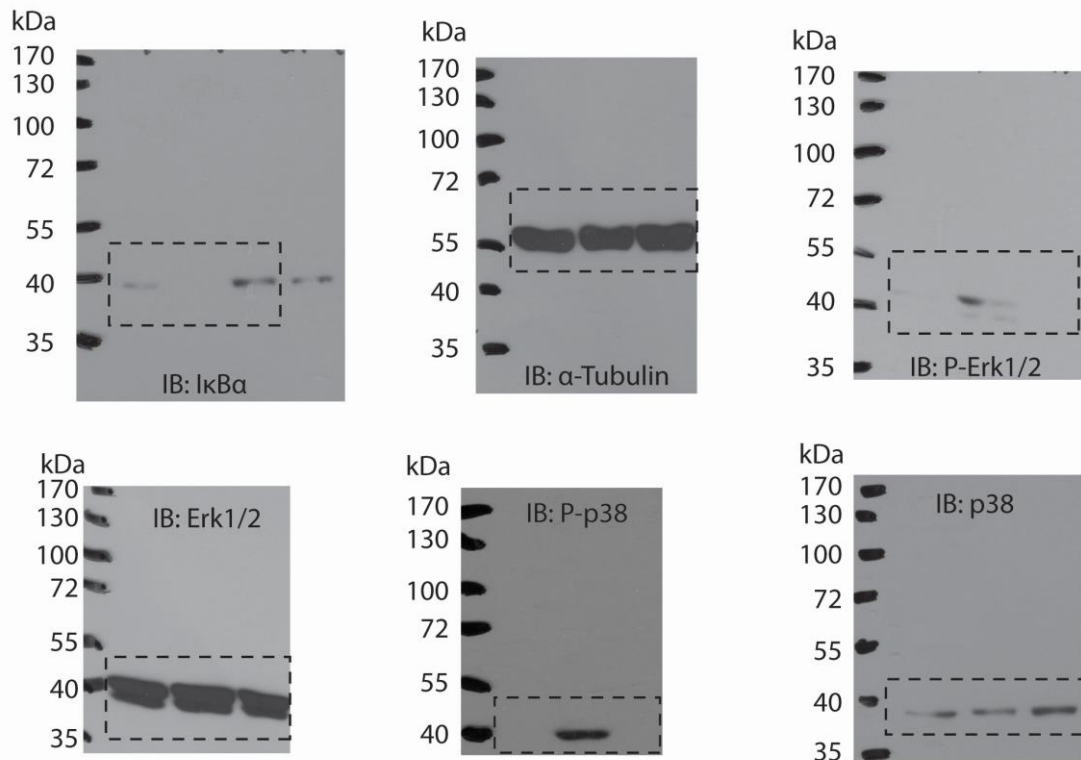

Original immunoblot data for Fig. 1d

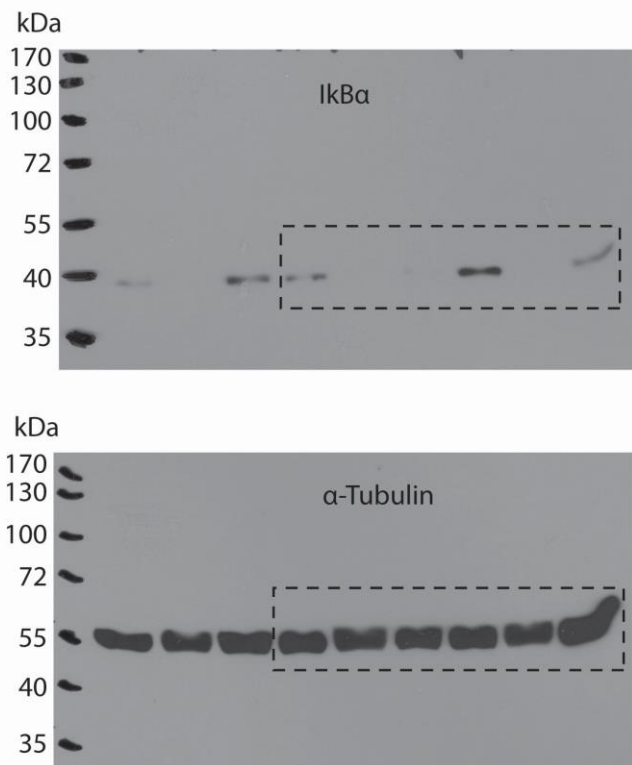

Supplementary Figure 6: Original Western blots for Figure 1



## Supplementary Figure 7

Original immunoblot data for Fig. 2e

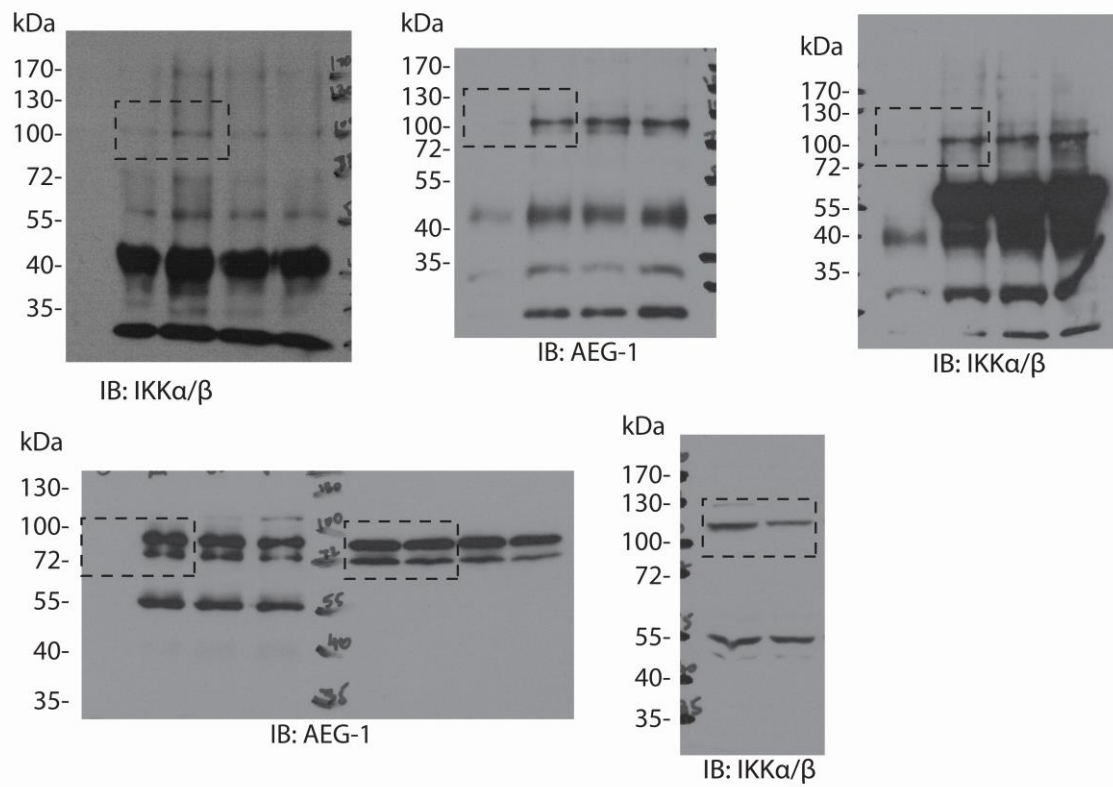

Original immunoblot data for Fig. 2f

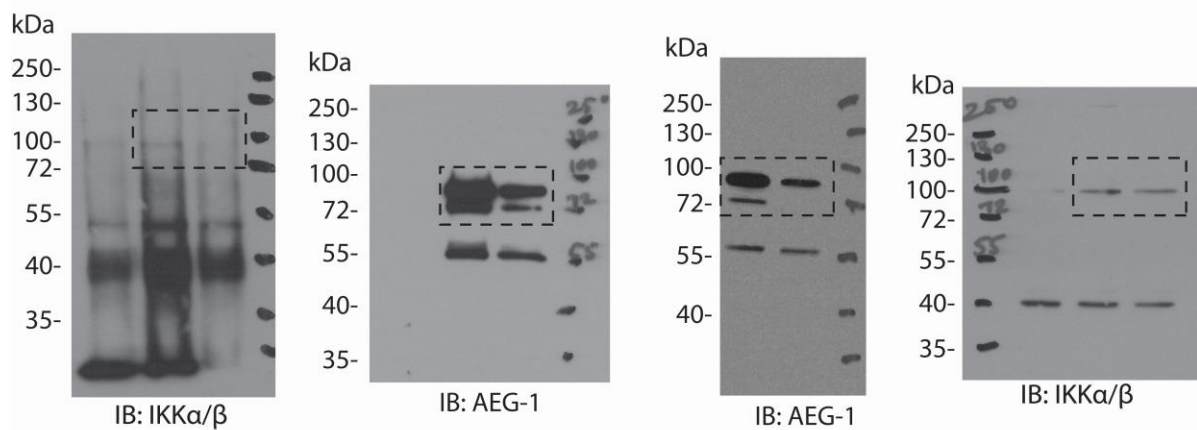

Original immunoblot data for Fig. 2g

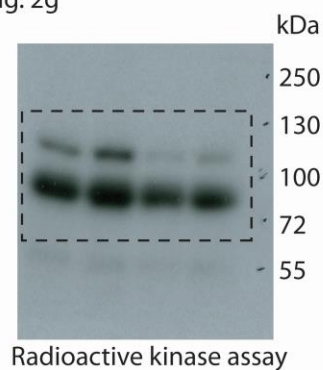

Supplementary Figure 7: Original Western blots for Figure 2

### Supplementary Figure 8

Original immunoblot data for Fig. 3e

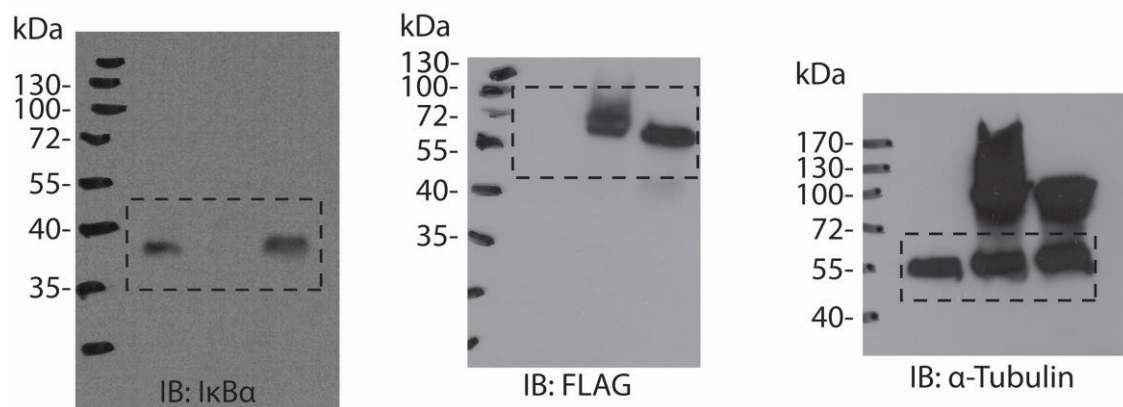

**Supplementary Figure 8: Original Western blots for Figure 3**

## Supplementary Figure 9

Original immunoblot data for Fig. 4a

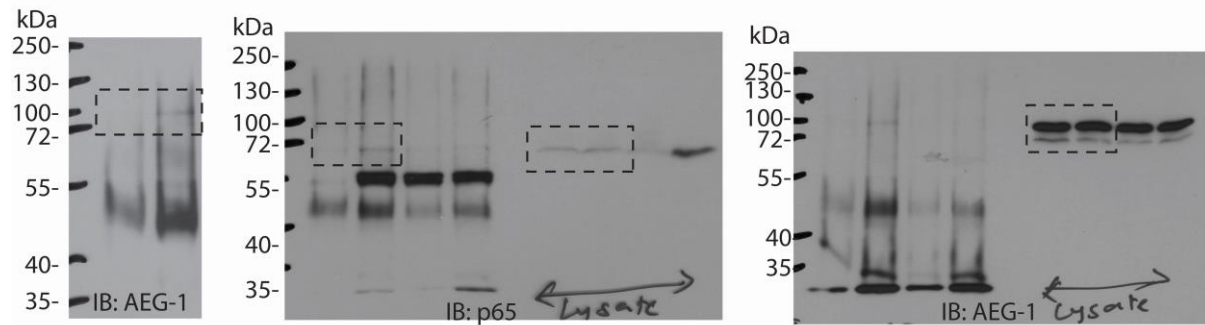

Original immunoblot data for Fig. 4b

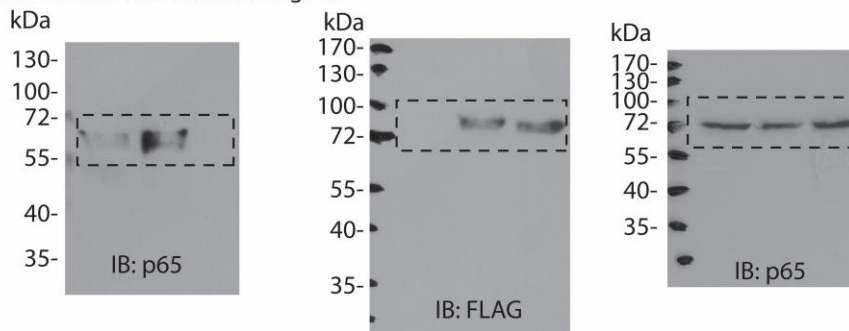

Original immunoblot data for Fig. 4c

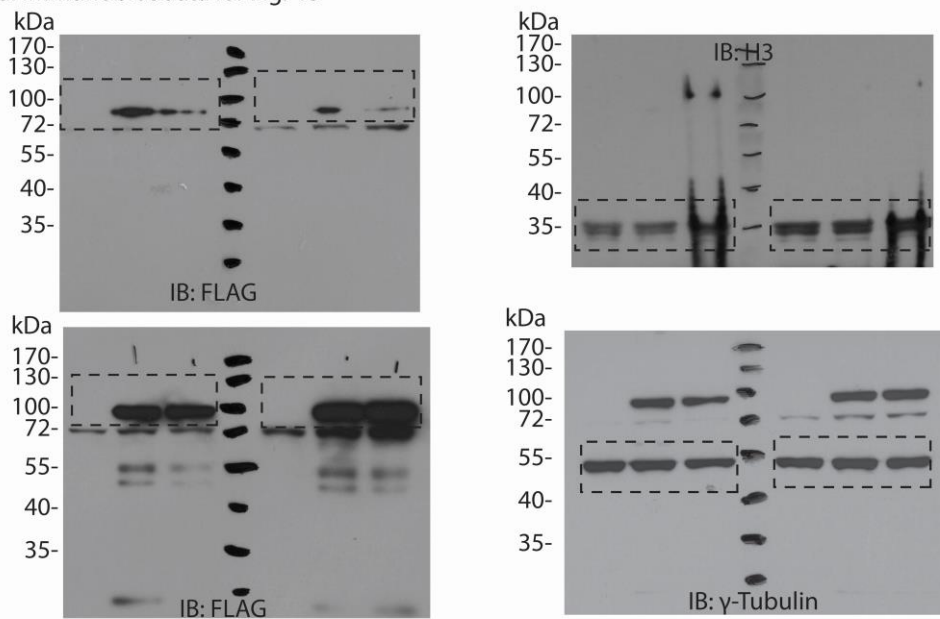

Original immunoblot data for Fig. 4d

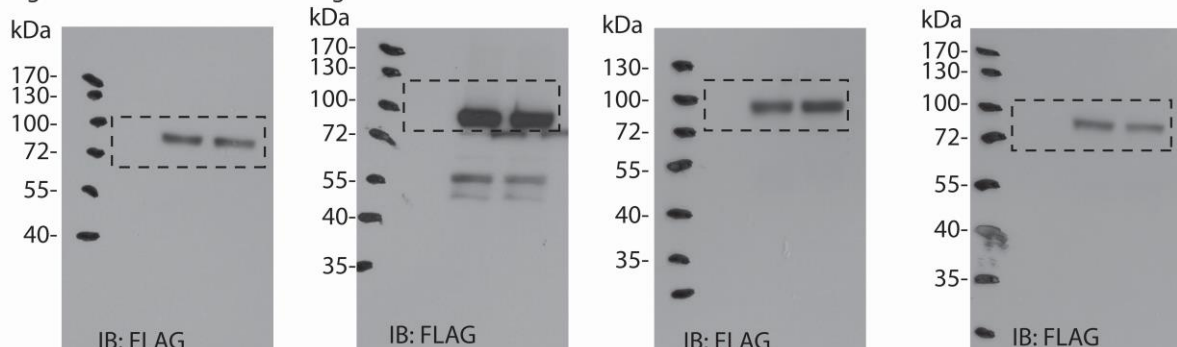

Supplementary Figure 9: Original Western blots for Figure 4

## Supplementary Figure 10

Original immunoblot data for Fig. 5a

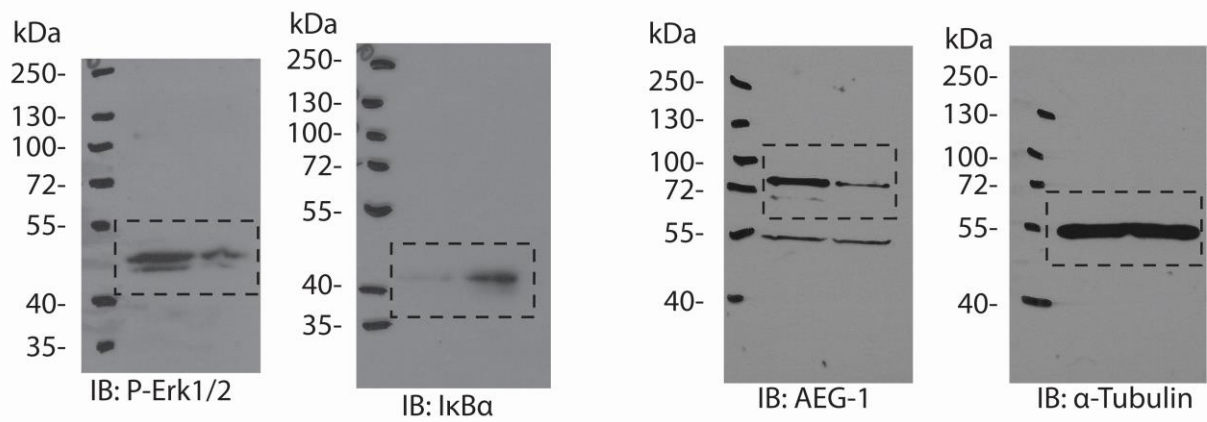

Original immunoblot data for Fig. 5b

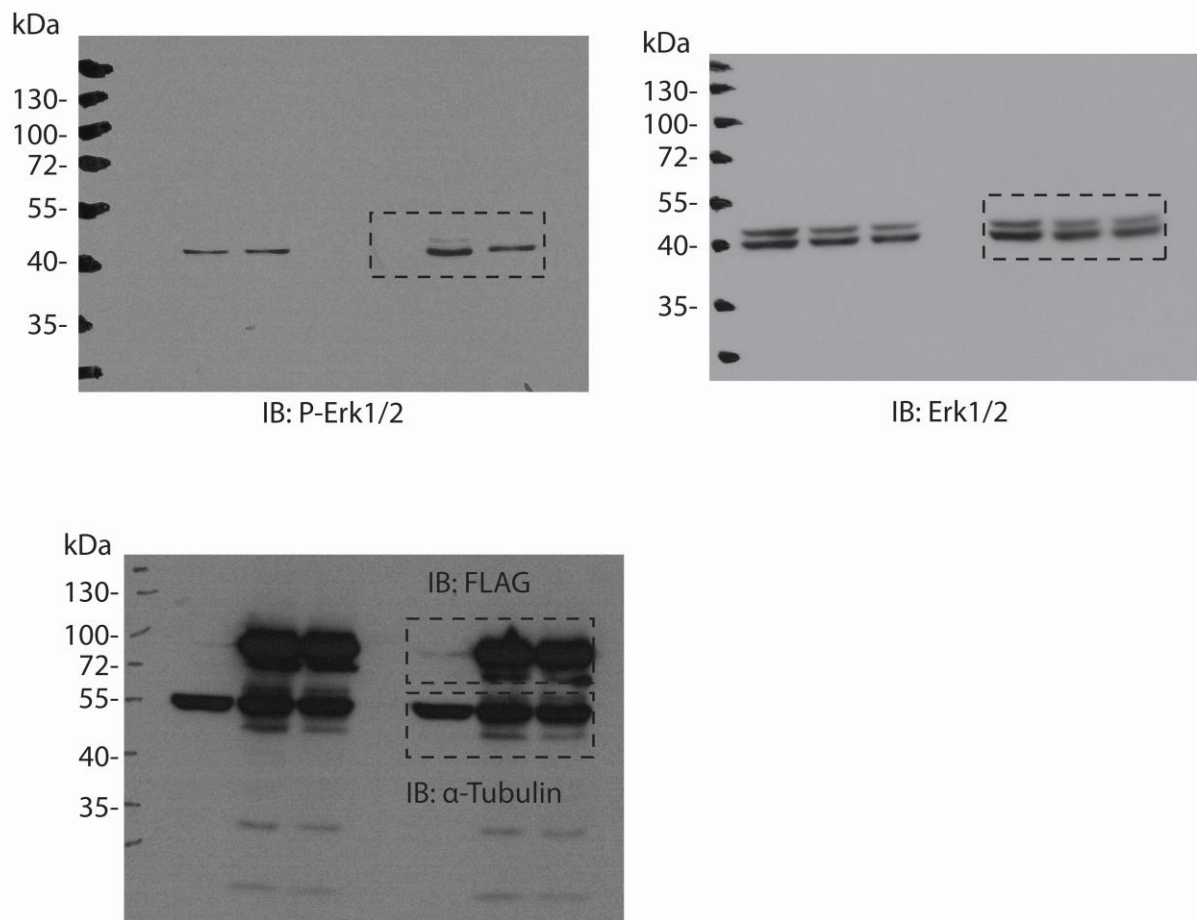

Supplementary Figure 10: Original Western blots for Figure 5

## Supplementary Figure 11

Original immunoblot data for Suppl Fig. 4a

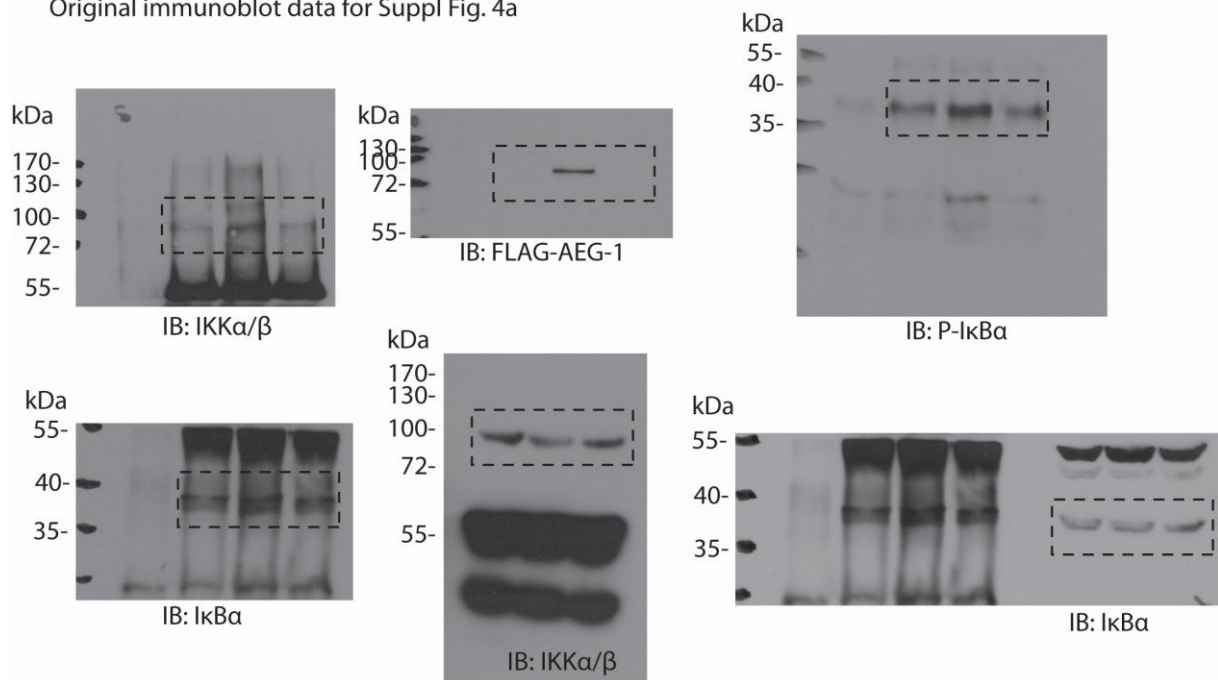

Original immunoblot data for Suppl Fig. 4b

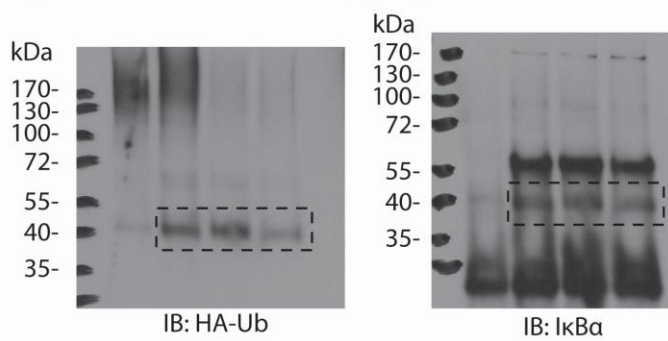

Original immunoblot data for Suppl Fig. 4c

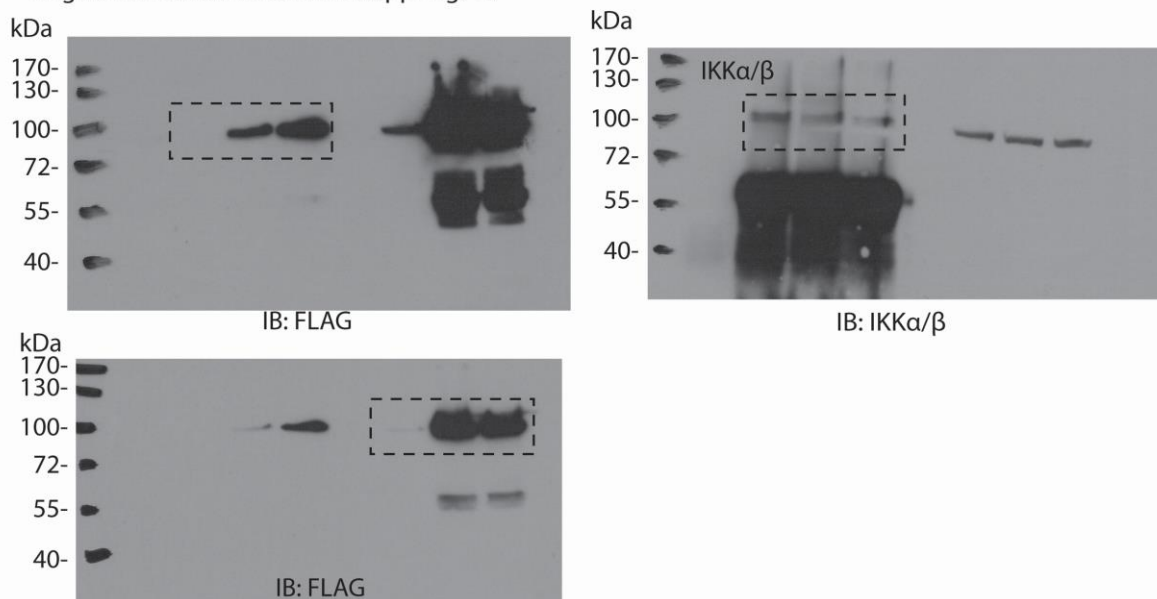

Supplementary Figure 11: Original Western blots for Supplementary Figure 4
